# Supplementary material for: Ordering of colloidal hard spheres under gravity: from monolayer to multilayer
Source: Royal Society of Chemistry journal article supplement (doi:10.1039/c8sm02243g), 2019-01-01
Supplement: c8sm02243g1.pdf [file c8sm02243g1.pdf]

## Supplementary Material (ESI) for *Soft Matter*

### Ordering of colloidal hard spheres under gravity: From monolayer to multilayer

Ziwei Guo, Peiyao Wu, and James T. Kindt\*  
Emory University, Department of Chemistry  
Atlanta, GA 30322 USA

\*Corresponding author: E-mail: jkindt@emory.edu

#### ESI contents:

**Table S1:** Fugacity  $f$  and mean total area fraction  $\eta_{tot}$  in fluid and ordered phases under coexistence conditions from GCMC simulations.

**Fig. S1:** Snapshots from grain boundary simulations showing part of one GB.

**Fig. S2:** Translational correlations in ordered phases at phase coexistence.

**Table S1:** Fugacity  $f$  and mean total area fraction  $\eta_{tot}$  in fluid and ordered phases under coexistence conditions from GCMC simulations.

| Pe        | Fugacity at transition | $\eta_{tot}$ of fluid phase | $\eta_{tot}$ of ordered phase |
|-----------|------------------------|-----------------------------|-------------------------------|
| Hard Disc | $3.65 \times 10^5$ *   | 0.699                       | 0.718                         |
| 24        | $9.20 \times 10^6$     | 0.702                       | 0.721                         |
| 18        | $2.15 \times 10^7$     | 0.776                       | 0.786                         |
| 16        | $2.52 \times 10^8$     | 1.098                       | 1.113                         |
| 14        | $2.35 \times 10^8$     | 1.203                       | 1.221                         |
| 12.8      | $1.82 \times 10^8$     | 1.245                       | 1.260                         |
| 10        | $1.72 \times 10^8$     | 1.433                       | 1.447                         |
| 8         | $2.00 \times 10^8$     | 1.765                       | 1.780                         |
| 6         | $1.45 \times 10^8$     | 2.184                       | 2.216                         |

\* Hard disc fugacity is given using 2d standard state;  
equivalent 3d fugacity in limit  $Pe \rightarrow \infty$  is  $f = 3.65 \times 10^5 \times Pe$

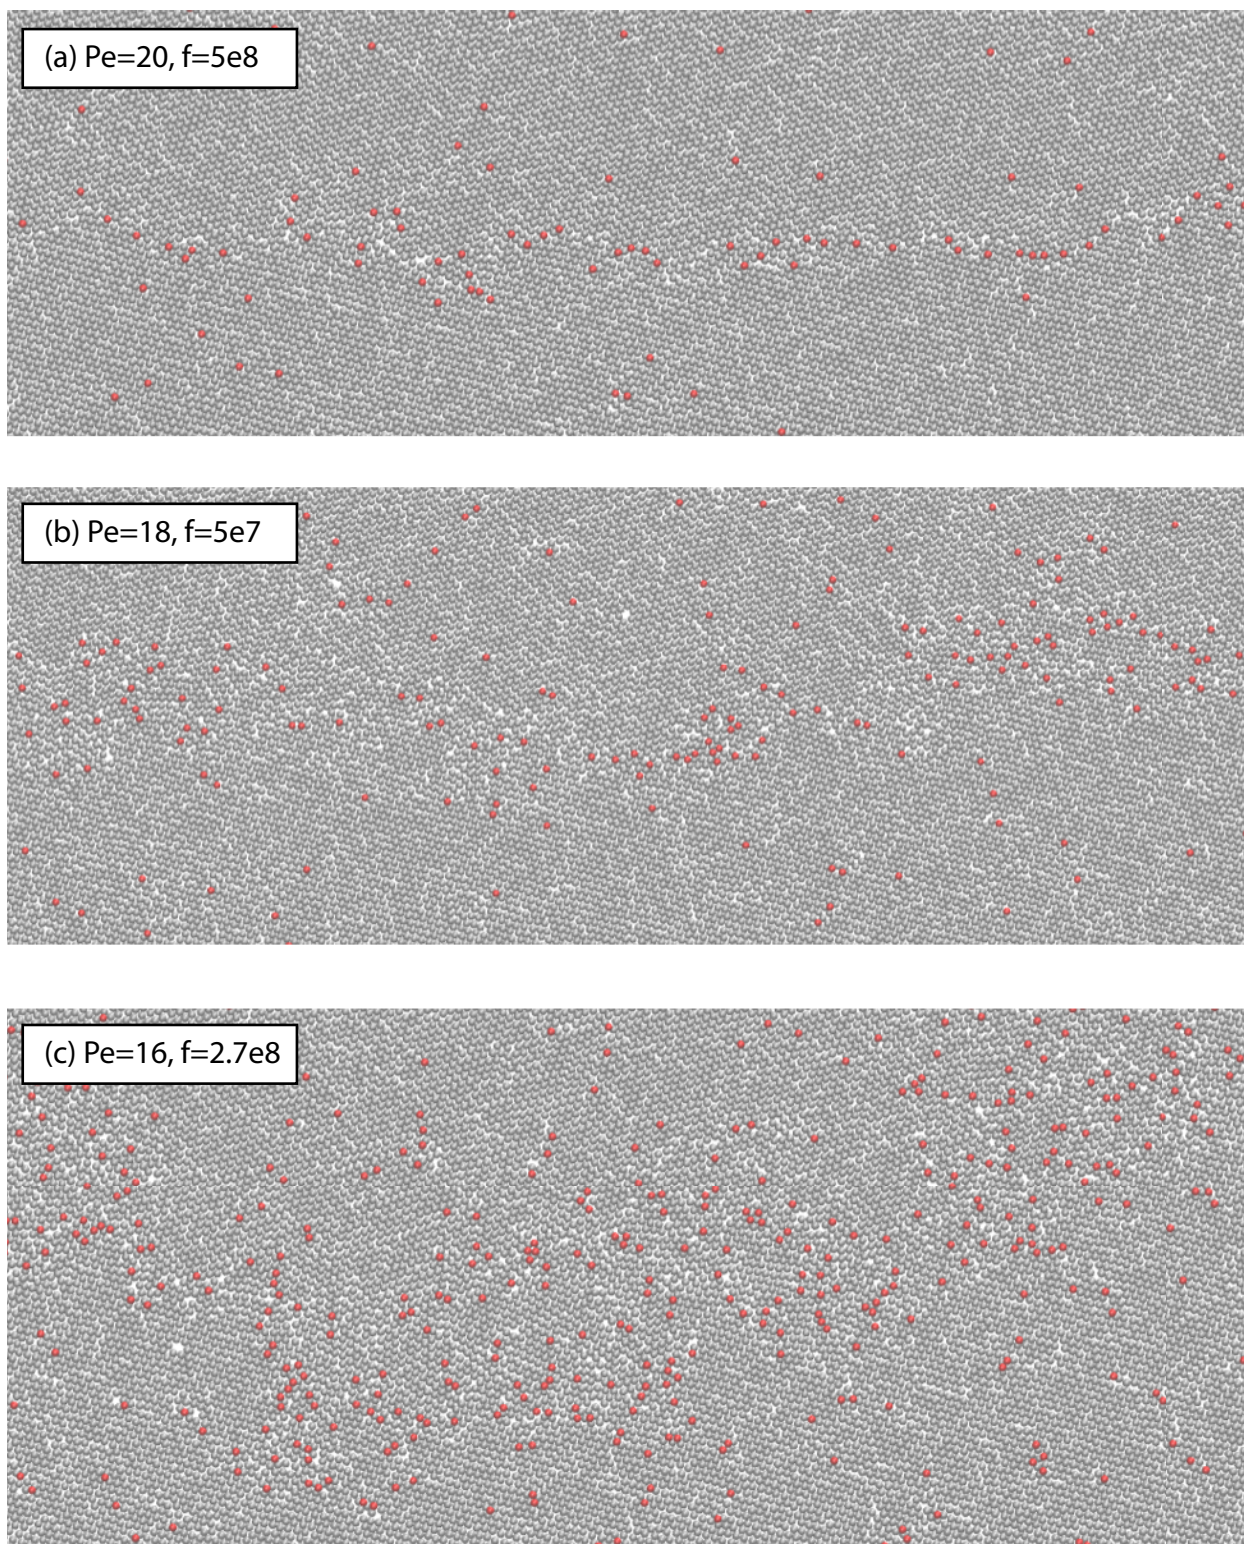

**Fig. S1** Snapshots from grain boundary simulations showing part of one GB, with base layer ( $z < 0.5\sigma$ ) particles colored in grey and particles in the height range  $0.5\sigma < z < 0.8\sigma$  shown in red. Other overlayer particles are omitted.

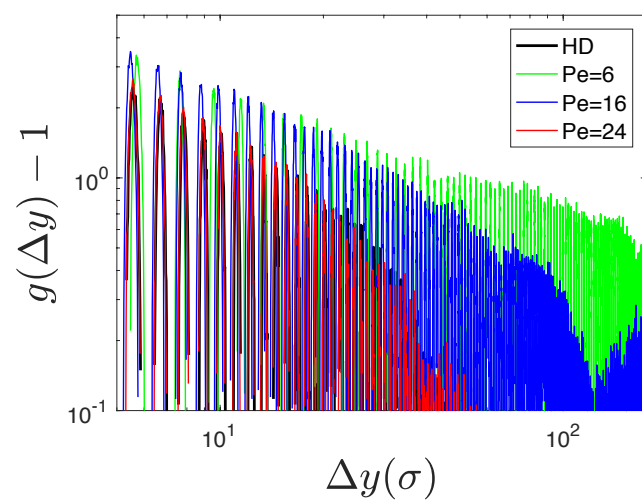

**Fig. S2** Translational correlations in ordered phases at phase coexistence point.
